# Supplementary material for: Computational approaches for isoform detection and estimation: good and bad news
Source: PubMed Central journal article supplement (PMC4098781; doi:10.1186/1471-2105-15-135), 2014-05-09
Supplement: 1471-2105-15-135-S3.pdf [file 1471-2105-15-135-S3.pdf]

# PE 50 bp (Set-up 1)

Alignment with transcriptome

Alignment data driven

## CA

F-measure (50 read length)

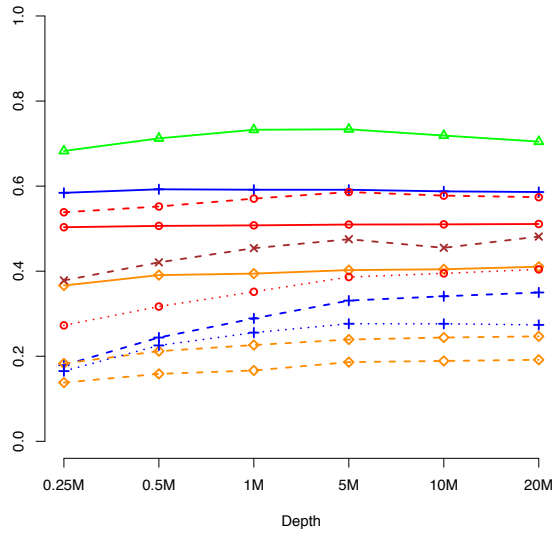

A

## IA

F-measure (50 read length)

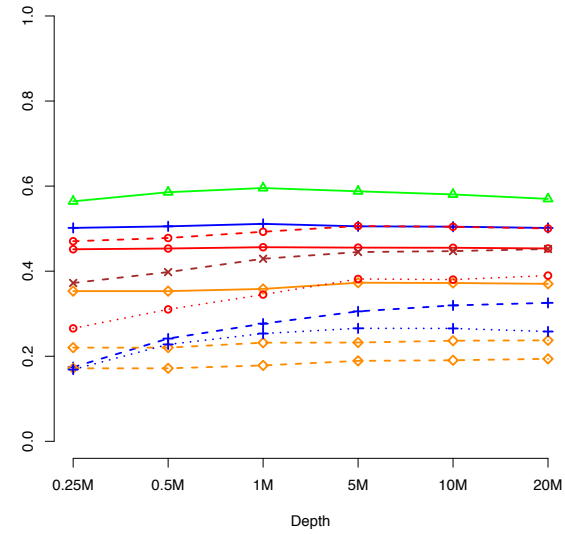

B

F-measure (50 read length)

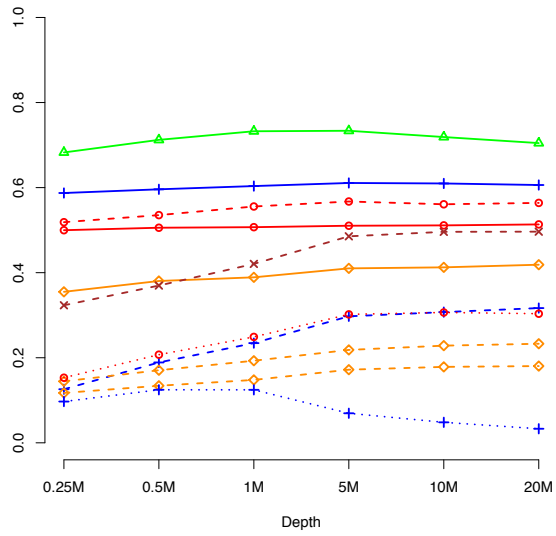

C

F-measure (50 read length)

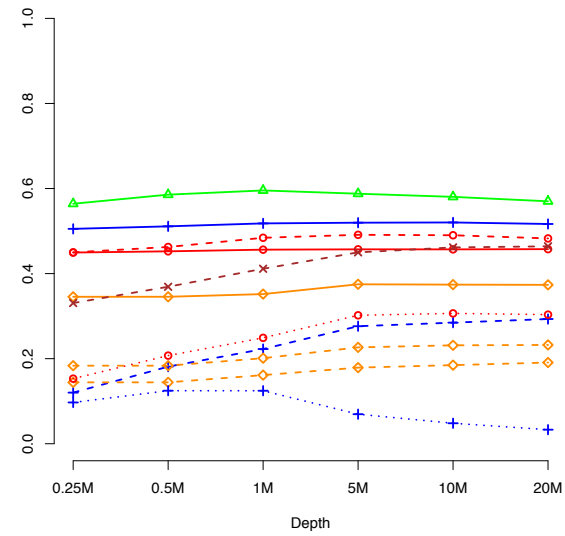

D
