# Supplementary material for: Computational approaches for isoform detection and estimation: good and bad news
Source: PubMed Central journal article supplement (PMC4098781; doi:10.1186/1471-2105-15-135), 2014-05-09

# SE 100 bp – 0.25 M (Set-up 1)

Alignment with transcriptome

CA

TP and FP (CA– 100 read length)

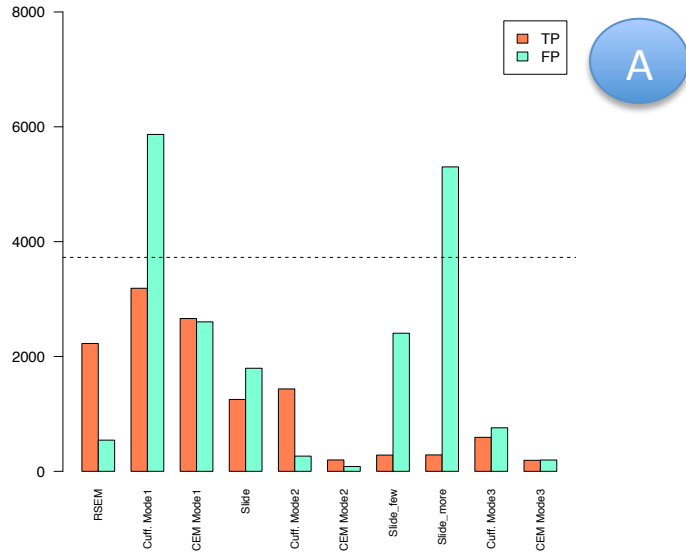

IA

TP and FP (IA– 100 read length)

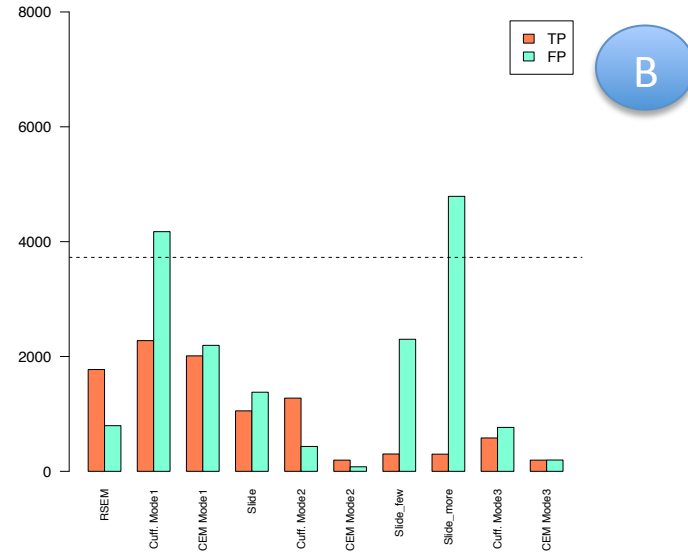

Alignment data driven

TP and FP (CA– 100 read length)

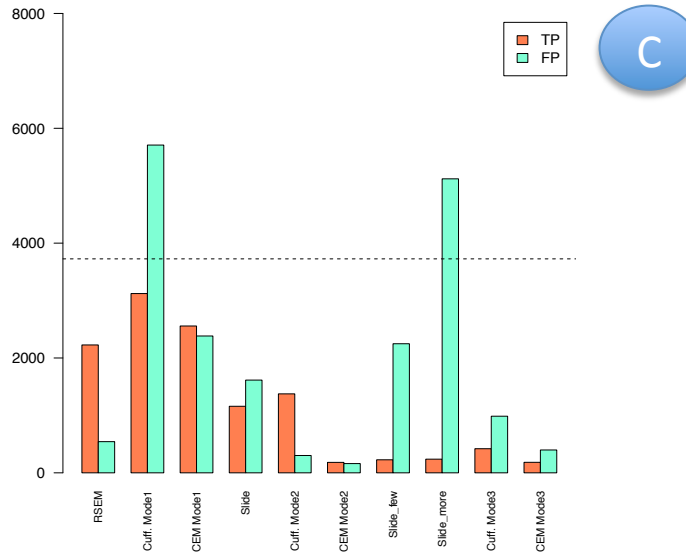

TP and FP (IA– 100 read length)

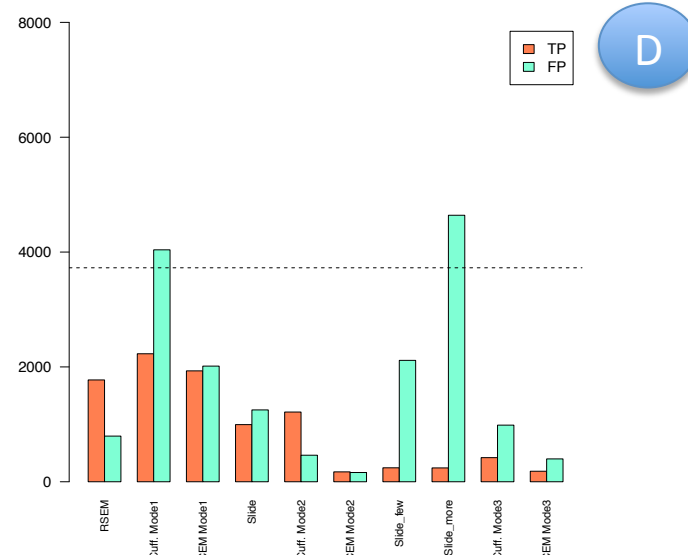

Supplement: 1471-2105-15-135-S8.pdf [file 1471-2105-15-135-S8.pdf]
