# Supplementary material for: Computational approaches for isoform detection and estimation: good and bad news
Source: PubMed Central journal article supplement (PMC4098781; doi:10.1186/1471-2105-15-135), 2014-05-09
Supplement: 1471-2105-15-135-S10.pdf [file 1471-2105-15-135-S10.pdf]

# PE 50 bp (Set-up 2)

Alignment with transcriptome

Precision (50 read length)

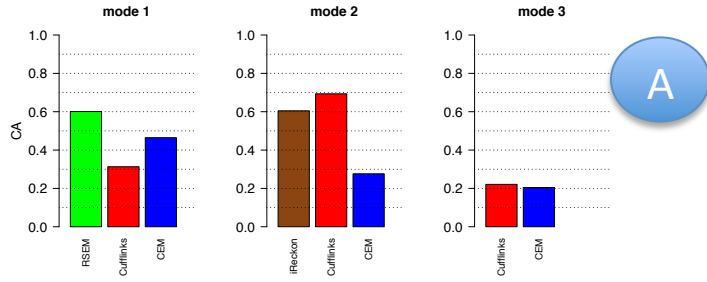

Recall (50 read length)

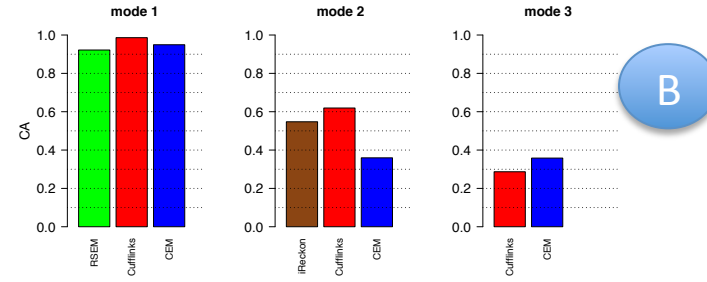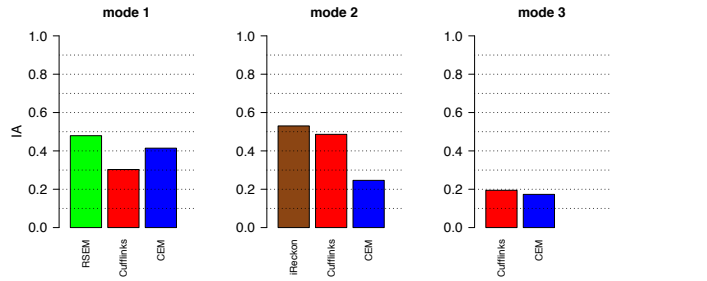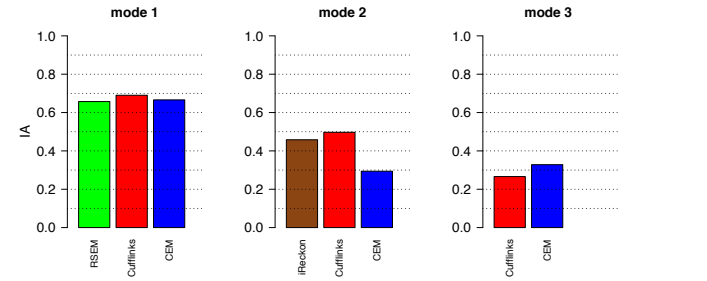

Precision (50 read length)

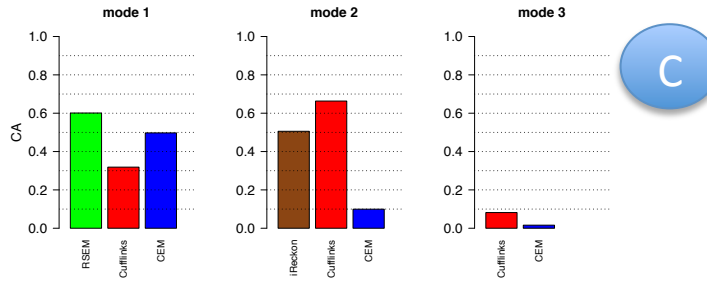

Recall (50 read length)

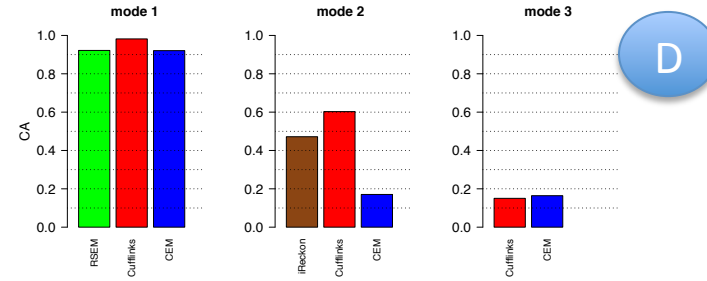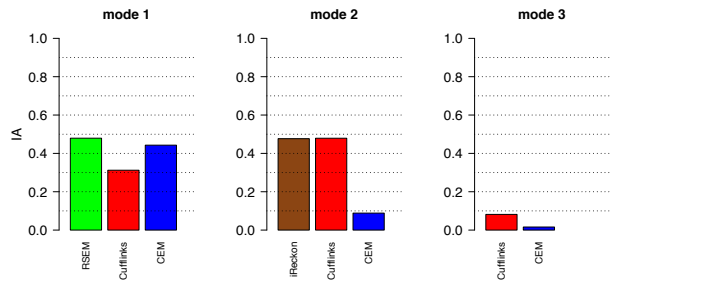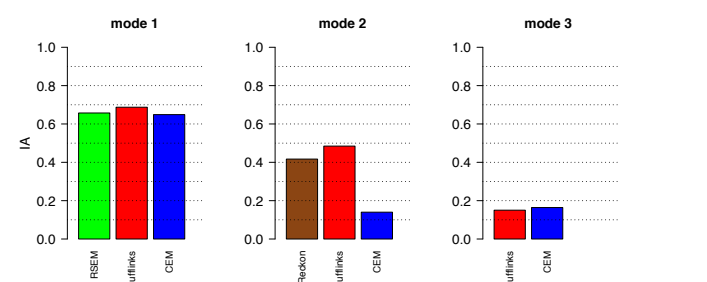

Alignment data driven
