# Supplementary material for: Computational approaches for isoform detection and estimation: good and bad news
Source: PubMed Central journal article supplement (PMC4098781; doi:10.1186/1471-2105-15-135), 2014-05-09
Supplement: 1471-2105-15-135-S11.pdf [file 1471-2105-15-135-S11.pdf]

# PE 75 bp (Set-up 2)

Alignment with transcriptome

Recall (CA – 75 read length)

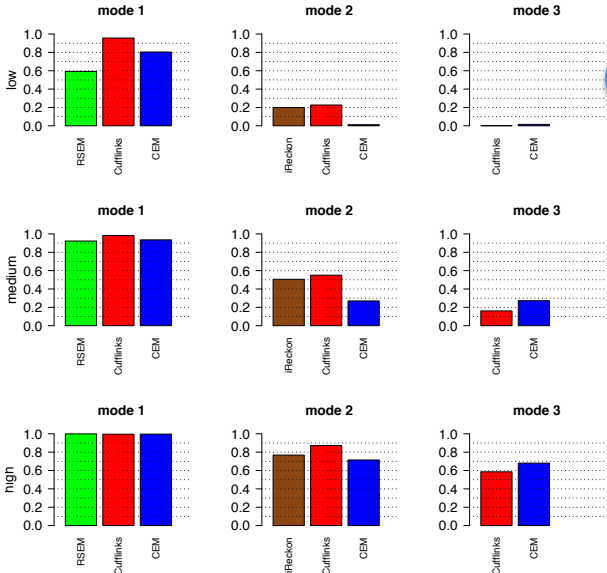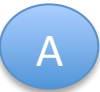

Recall (IA – 75 read length)

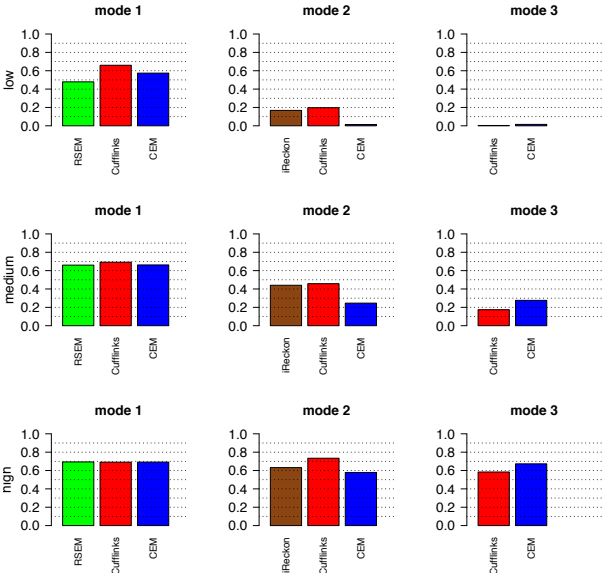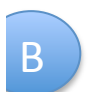

Recall (CA – 75 read length)

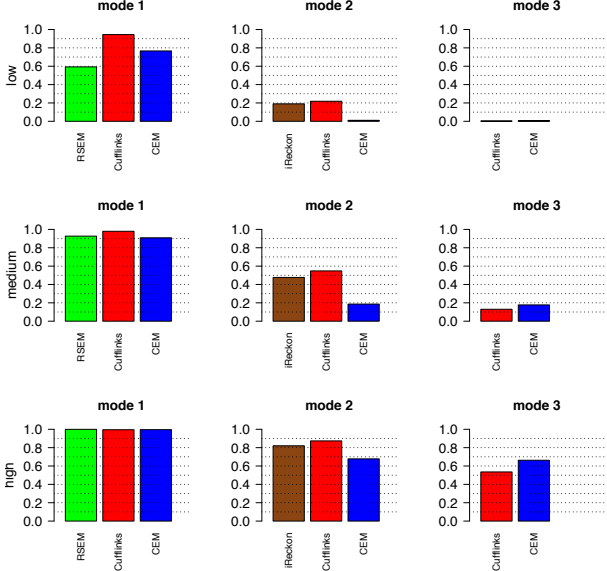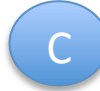

Recall (IA – 75 read length)

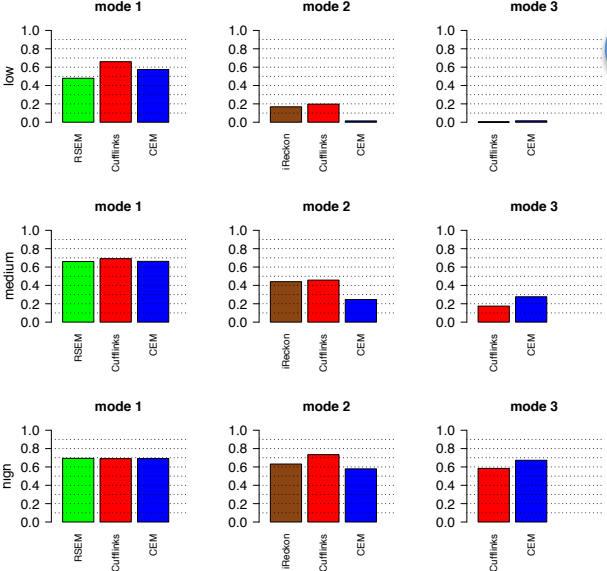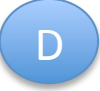

Alignment data driven
