# Supplementary material for: Computational approaches for isoform detection and estimation: good and bad news
Source: PubMed Central journal article supplement (PMC4098781; doi:10.1186/1471-2105-15-135), 2014-05-09

# Set-up 2, CA, alignment with transcriptome

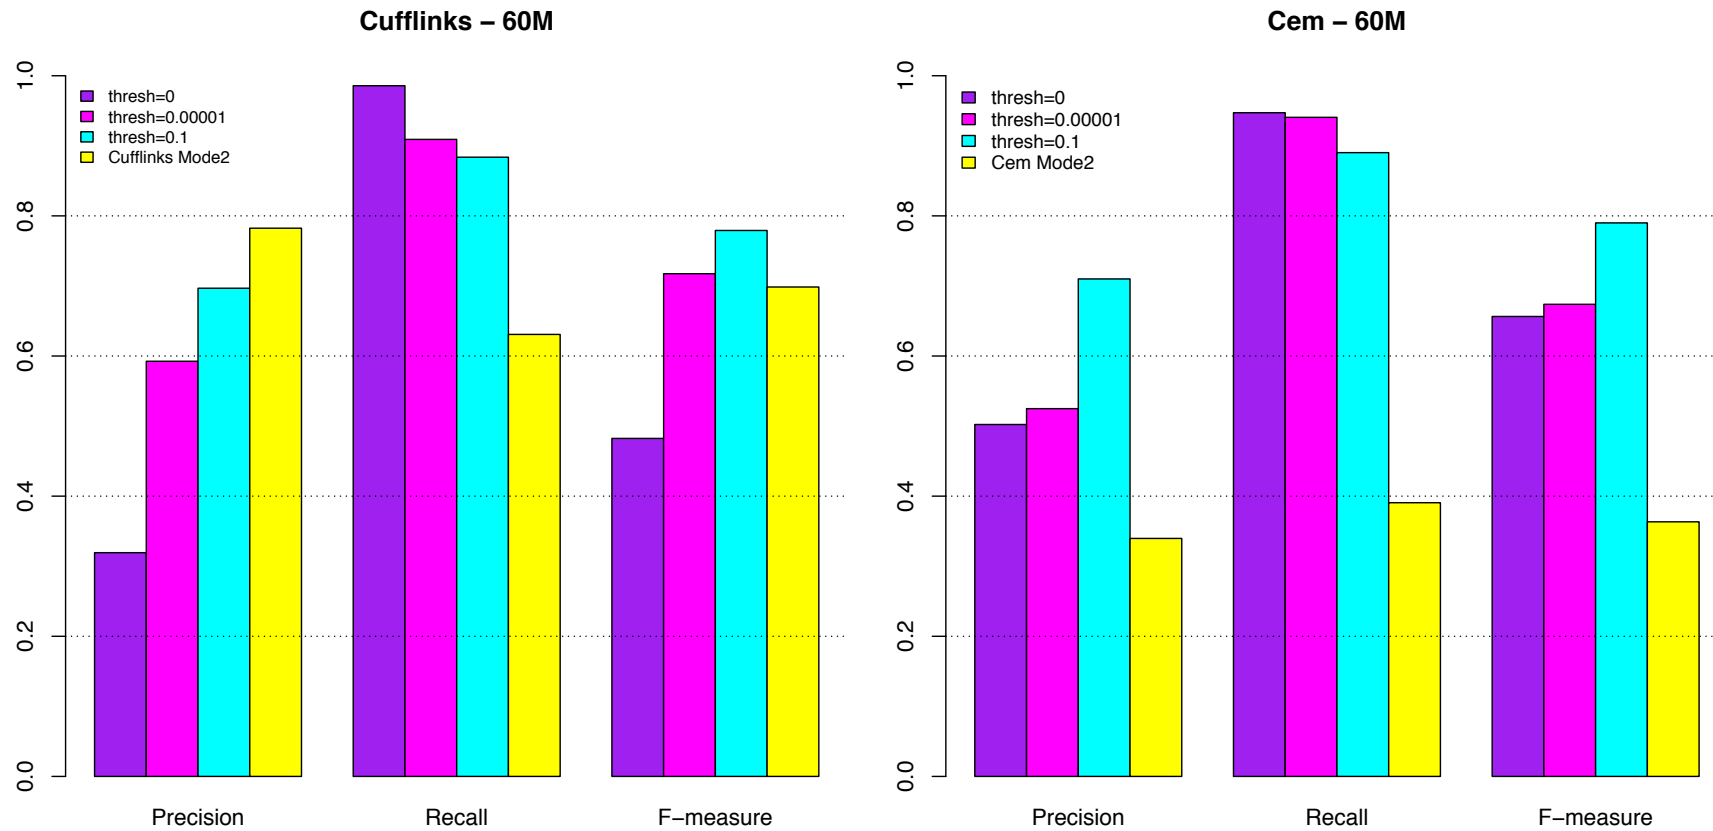

Supplement: 1471-2105-15-135-S13.pdf [file 1471-2105-15-135-S13.pdf]
